# Supplementary material for: Coexpression patterns define epigenetic regulators associated with neurological dysfunction
Source: Genome Res. 2019 Apr;29(4):532–42. doi: 10.1101/gr.239442.118 (PMC6442390; doi:10.1101/gr.239442.118)
Supplement: Supplemental Material [file supp_gr.239442.118_Supplemental_Table_S11.xlsx]

## Sheet: Sheet1
#The 29 common traits for which stratified LD-score regression was performed. The table includes the sample size for each GWAS as well as links to the summary statistics.
Trait	Type	N	N_cases	N_controls	Link to GWAS data	Filename	MD5 checksum	Publication
ADHD	Psychiatric	96990	12645	84345	http://www.med.unc.edu/pgc/results-and-downloads	package.zip	c81ea9633e88b3513ccf634b5ada40d6	Not yet published
Alzheimers disease	Neurological	54162	17008	37154	http://web.pasteur-lille.fr/en/recherche/u744/igap/igap_download.php	IGAP_summary_statistics.zip	99459f68fd909a596d58ec4ed5a4713f	24162737
Anorexia nervosa	Psychiatric	14600	3495	11105	http://www.med.unc.edu/pgc/results-and-downloads	pgc.ed.freeze1.July2017.zip	a761bdacc52f2543fc2cdce078096d4b	28494655
Anxiety disorder	Psychiatric	17526	5761	11765	http://www.med.unc.edu/pgc/results-and-downloads	angst.study.results.zip	6bc88d2c9d3385a6acdd5a1bc209d888	26857599
Autism spectrum disorder	Psychiatric	13556	6179	7377	http://www.med.unc.edu/pgc/results-and-downloads	daner_AUT_meta14.hg19.Mar2016_info_0.60_maf_0.05_release_Jun2017.tar.gz	08d87fa42c7e926533f6a749be677705	28540026
Bipolar disorder	Psychiatric	16731	NA	NA	http://www.med.unc.edu/pgc/results-and-downloads	pgc.bip.2012-04.zip	a675a65c7ff3eb824f90910e8ffc0fdd	21926972
BMI	Additional_phenotype	339224	NA	NA	https://portals.broadinstitute.org/collaboration/giant/index.php/Main_Page	All_ancestries_SNP_gwas_mc_merge_nogc.tbl.uniq.gz	None supplied	25673413
Childhood cognitive performance	Behavioural-cognitive	17989	NA	NA	https://www.thessgac.org/data	CHIC_Summary_Benyamin2014.txt.gz	None supplied	23358156
Cigarettes per day	Behavioural-cognitive	38617	NA	NA	http://www.med.unc.edu/pgc/results-and-downloads	tag.cpd.tbl.gz	ee43737cec4f1b184074ce07ea600b85	20418890
College attainment	Behavioural-cognitive	120917	NA	NA	https://www.thessgac.org/data	SSGAC_Rietveld2013.zip	None supplied	23722424
Conscientiousness	Behavioural-cognitive	17375	NA	NA	http://www.tweelingenregister.org/GPC/	GPC-1.BigFiveNEO.zip	None supplied	21173776
Coronary artery disease	Additional_phenotype	86995	NA	NA	http://www.cardiogramplusc4d.org/	cardiogram_gwas_results.zip	None supplied	21673312
Crohns disease	Additional_phenotype	20883	NA	NA	https://www.ibdgenetics.org/downloads.html	iibdgc-trans-ancestry-filtered-summary-stats.tgz	None supplied	23128233
Depressive symptoms	Behavioural-cognitive	161460	NA	NA	https://www.thessgac.org/data	DS_Full.txt.gz	None supplied	27089181
Epilepsy	Neurological	28218	7779	20439	http://www.epigad.org/gwas_ilae2014/	ILAE_All_Epi_11.8.14.txt.gz	None supplied	25087078
Ever smoked	Behavioural-cognitive	74035	NA	NA	http://www.med.unc.edu/pgc/results-and-downloads	tag.evrsmk.tbl.gz	9216b2742390819b4d5d0e4673926885	20418890
Extraversion	Behavioural-cognitive	63030	NA	NA	http://www.tweelingenregister.org/GPC/	GPC-1.BigFiveNEO.zip	None supplied	26362575
Focal epilepsy	Neurological	22586	4601	17985	http://www.epigad.org/gwas_ilae2014/	ILAE_Focal_5.8.14.txt.gz	None supplied	25087078
Generalized epilepsy	Neurological	18769	2525	16244	http://www.epigad.org/gwas_ilae2014/	ILAE_GGE_5.8.14.txt.gz	None supplied	25087078
Height	Additional_phenotype	253288	NA	NA	https://portals.broadinstitute.org/collaboration/giant/index.php/Main_Page	GIANT_HEIGHT_Wood_et_al_2014_publicrelease_HapMapCeuFreq.txt.gz	None supplied	25282103
IQ	Behavioural-cognitive	78308	NA	NA	http://ctg.cncr.nl/software/summary_statistics	sumstats.txt.gz	None supplied	28530673
Ischemic stroke	Neurological	29633	10307	19326	http://www.cerebrovascularportal.org/informational/downloads	4818561.Malik.2016.zip	None supplied	23041239
Major depressive disorder	Psychiatric	18759	9240	9519	http://www.med.unc.edu/pgc/results-and-downloads	pgc.mdd.2012-04.zip	895b82d43e11c5e915c34cab5a5e3335	23453885
Neuroticism	Behavioural-cognitive	170911	NA	NA	https://www.thessgac.org/data	Neuroticism_Full.txt.gz	None supplied	27089181
Openness	Behavioural-cognitive	17375	NA	NA	http://www.tweelingenregister.org/GPC/	GPC-1.BigFiveNEO.zip	None supplied	21173776
PTSD	Psychiatric	9537	2424	7113	http://www.med.unc.edu/pgc/results-and-downloads	All.zip	430915c1079cc33fb82e30f9d5b159f6	28439101
Schizophrenia	Psychiatric	77096	33640	43456	http://www.med.unc.edu/pgc/results-and-downloads	ckqny.scz2snpres.gz	af7b9b521a196ce711d99060426fe01e	25056061
Subjective well-being	Behavioural-cognitive	298420	NA	NA	https://www.thessgac.org/data	SWB_Full.txt.gz	None supplied	27089181
Years of education	Behavioural-cognitive	293723	NA	NA	https://www.thessgac.org/data	SSGAC_Rietveld2013.zip	None supplied	27225129
