# Supplementary material for: Coexpression patterns define epigenetic regulators associated with neurological dysfunction
Source: HighWire-hosted journal article supplement (doi:10.1101/gr.239442.118), 2019-03-11
Supplement: Supplemental_Code_1.zip [file Legend.pdf › ldsc/figures/Legend.pdf]

sig\_coef

○ FALSE

● TRUE

Category

● highly\_coexp\_all\_brain\_regulatory\_elements

● EM\_all\_brain\_regulatory\_elements
