# Supplementary figures and images for: Coexpression patterns define epigenetic regulators associated with neurological dysfunction
Source: HighWire-hosted journal article supplement (doi:10.1101/gr.239442.118), 2019-03-11

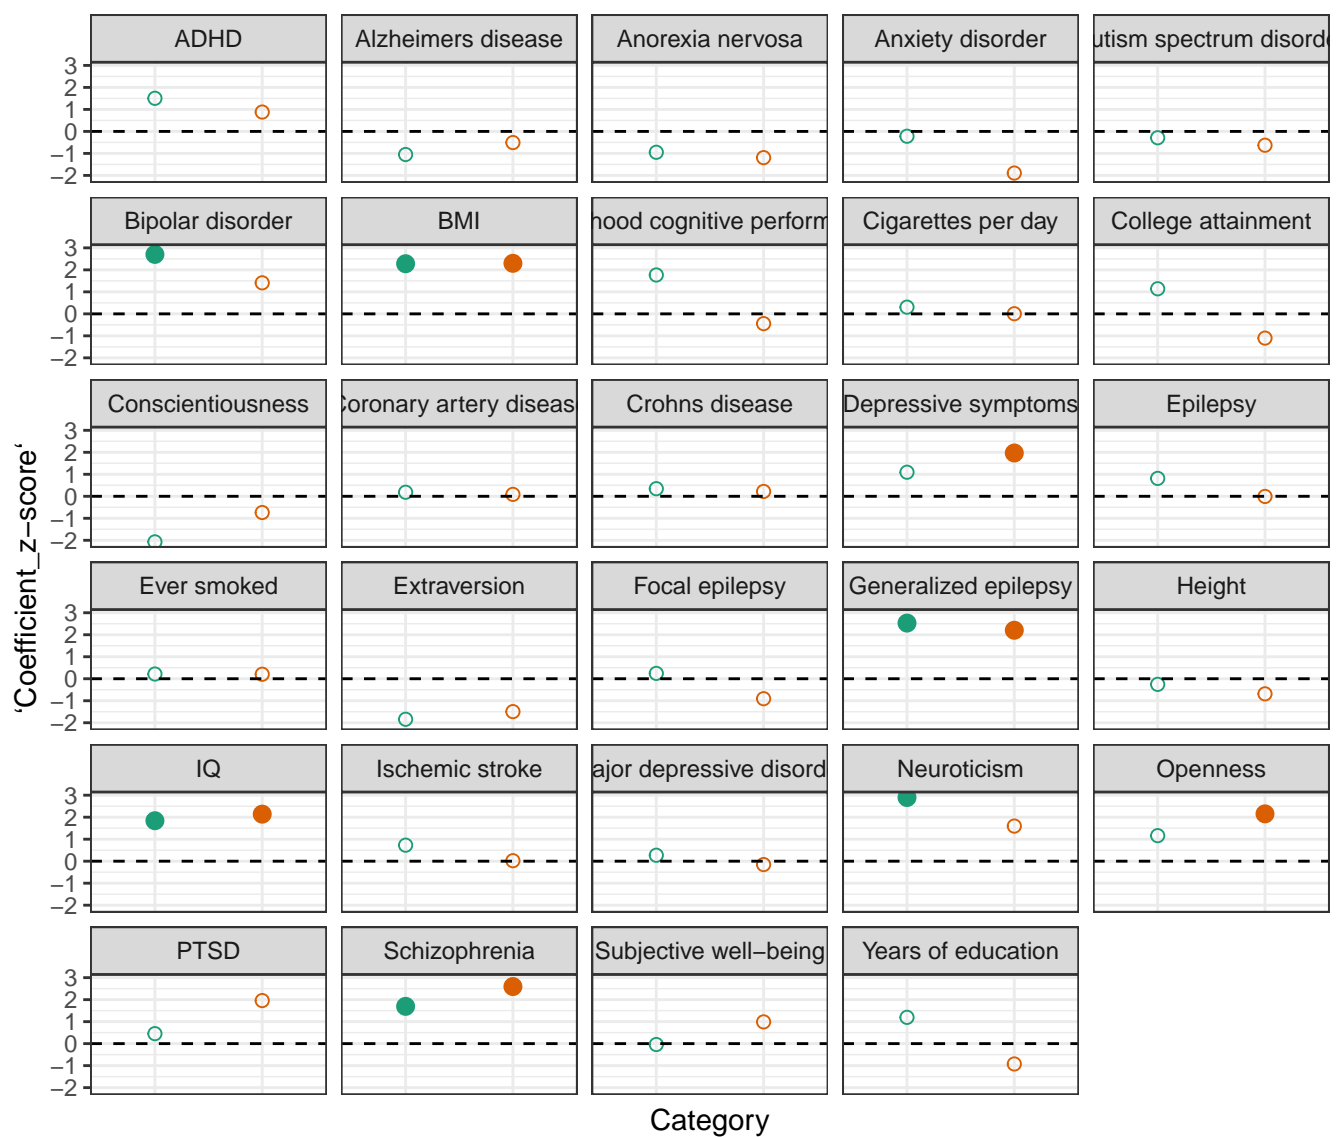

Supplement: Supplemental_Code_1.zip [file Coefficient_Z-score.baseline_adjustments.pdf › ldsc/figures/Coefficient_Z-score.baseline_adjustments.pdf]

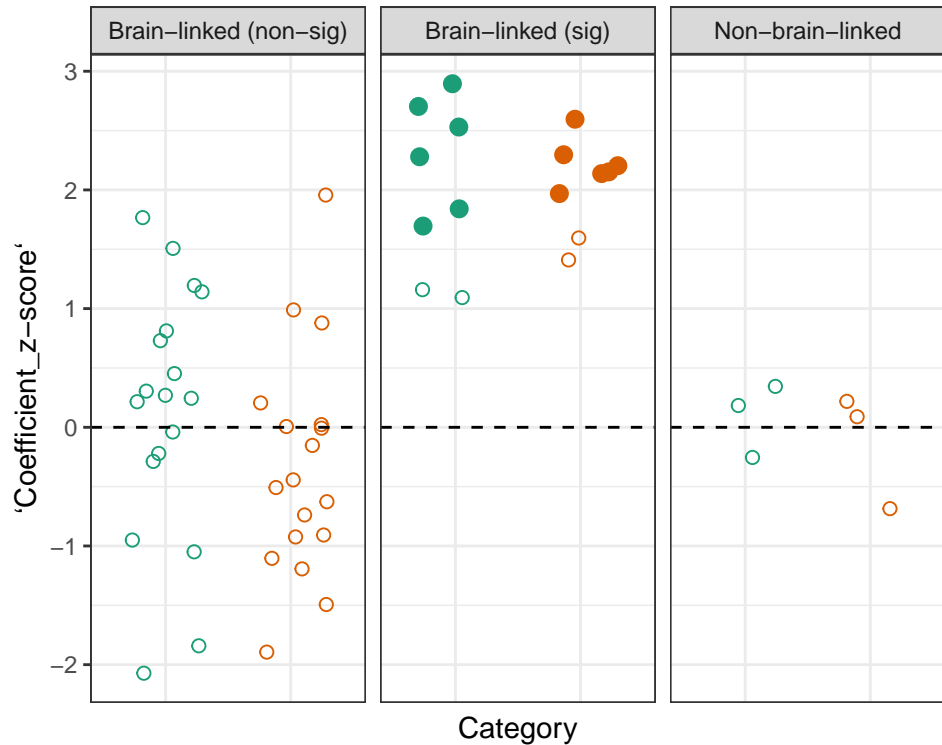

Supplement: Supplemental_Code_1.zip [file Coefficient_Z-score.baseline_adjustments.stratified.pdf › ldsc/figures/Coefficient_Z-score.baseline_adjustments.stratified.pdf]

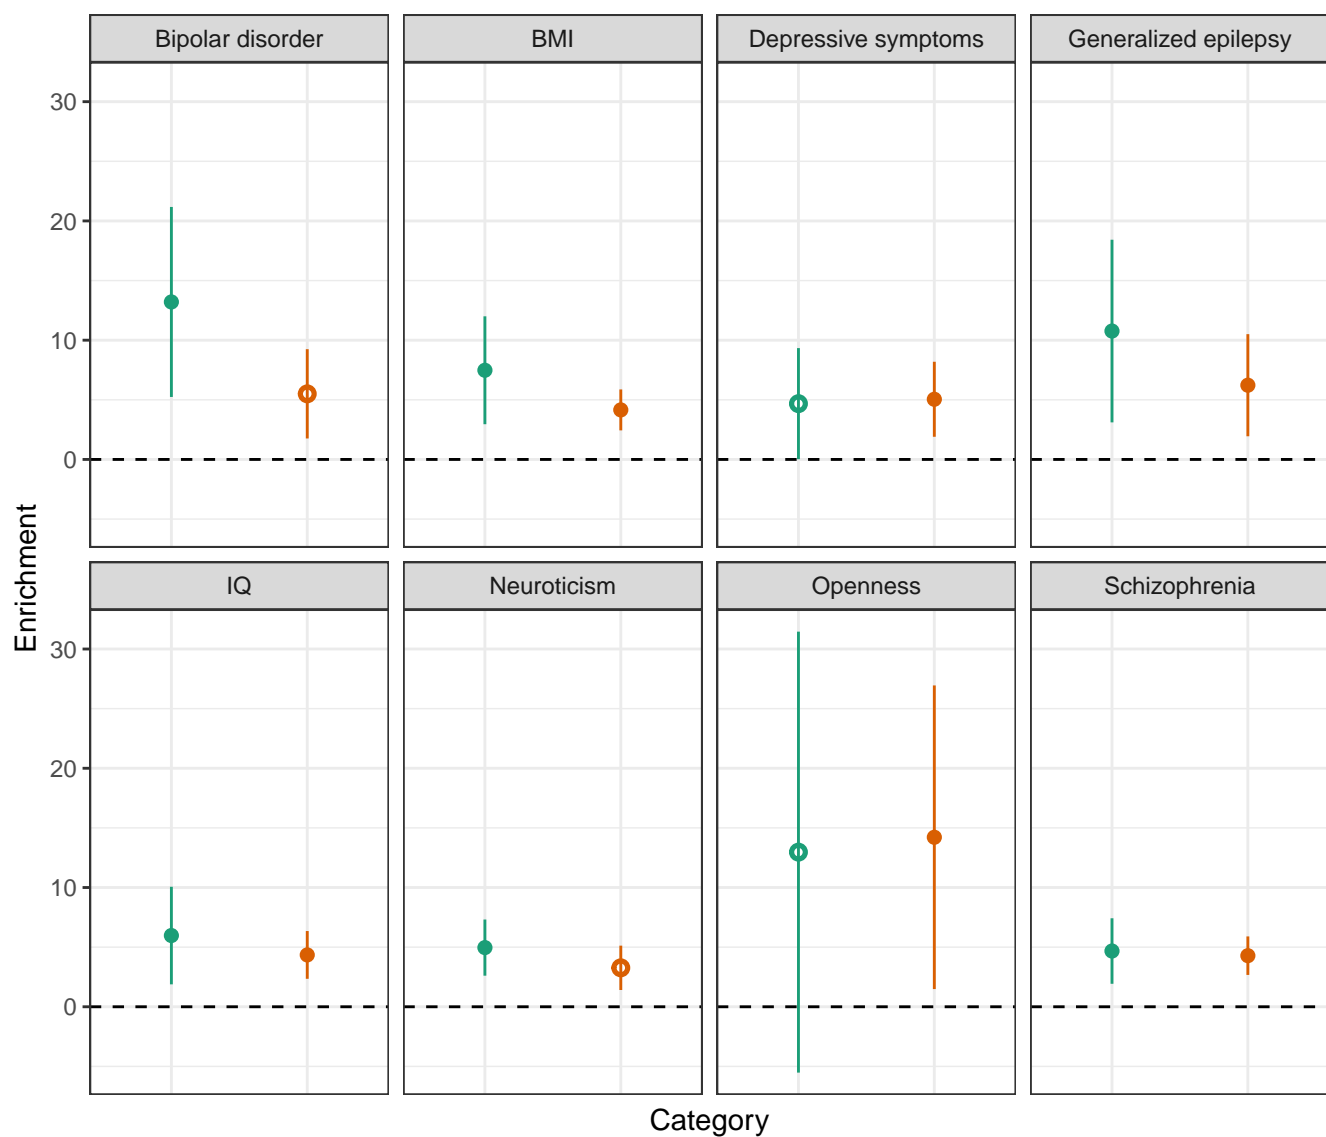

Supplement: Supplemental_Code_1.zip [file Enrichment.baseline_adjustments.pdf › ldsc/figures/Enrichment.baseline_adjustments.pdf]

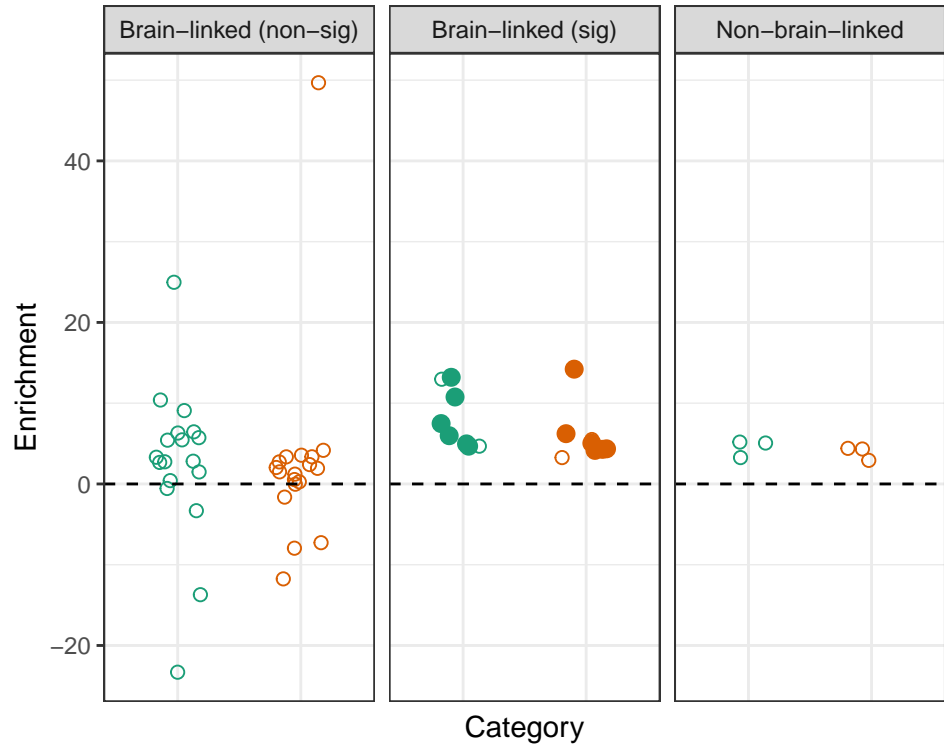

Supplement: Supplemental_Code_1.zip [file Enrichment.baseline_adjustments.sig_stratified.pdf › ldsc/figures/Enrichment.baseline_adjustments.sig_stratified.pdf]
